# Supplementary material
Source: MDPI journal article supplement (https://www.mdpi.com/2073-4441/12/6/1517)
Supplement: s1 [file s1]

# Chemical Clogging and Evolution of Head Losses in Steel Slag Filters Used for Phosphorus Removal

Dominique Claveau-Mallet and Yves Comeau

**Table S1.** Measurement of the hydraulic conductivity of column 2 at  $t = -1$  d using a constant head protocol. The hydraulic conductivity was calculated using the pressure head observed between cells 1 and 9 at a fixed influent flow rate, using tap water as influent. Q: influent flow rate,  $\Delta h$ : head between cell 1 and 9,  $\Delta L$ : distance between cell 1 and 9, A: area of the column, K: hydraulic conductivity calculated with  $K = \frac{Q\Delta L}{A\Delta H}$  (Darcy's law).

| Test | Q      | $\Delta h$ | $\Delta L$ | A               | K                     |
|------|--------|------------|------------|-----------------|-----------------------|
|      | mL/min | cm         | cm         | cm <sup>2</sup> | m/s                   |
| 1    | 70.4   | 0.25       | 120        | 78.54           | $7.06 \times 10^{-2}$ |
| 2    | 41.2   | 0.13       | 120        | 78.54           | $8.26 \times 10^{-2}$ |
| 3    | 39.4   | 0.13       | 120        | 78.54           | $7.90 \times 10^{-2}$ |
| 4    | 28.9   | 0.06       | 120        | 78.54           | $1.16 \times 10^{-1}$ |
| 5    | 24.2   | 0.05       | 120        | 78.54           | $1.21 \times 10^{-1}$ |
| 6    | 17.6   | 0.08       | 120        | 78.54           | $5.88 \times 10^{-2}$ |
| 7    | 12.1   | 0.03       | 120        | 78.54           | $1.21 \times 10^{-1}$ |
| mean |        |            |            |                 | $9.28 \times 10^{-2}$ |

Note: the column was kept saturated, but no precaution was made to ensure full saturation (e.g. no use of unaerated water, no measurement of the saturation level).

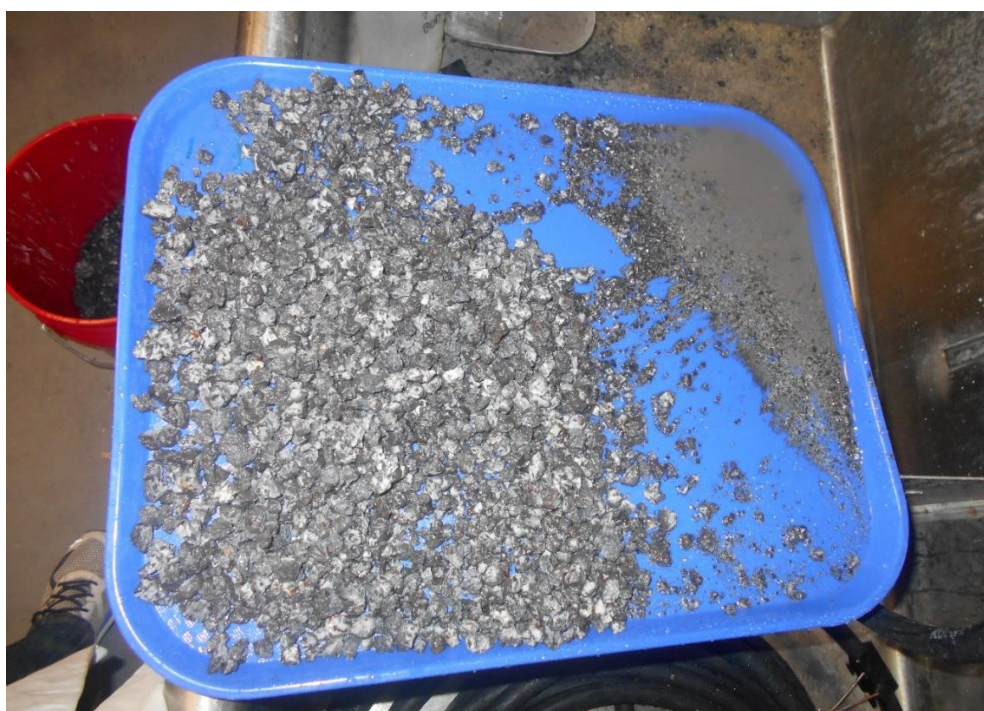

**Figure S1.** Precipitate sampling by washing and sedimentation in a pan.

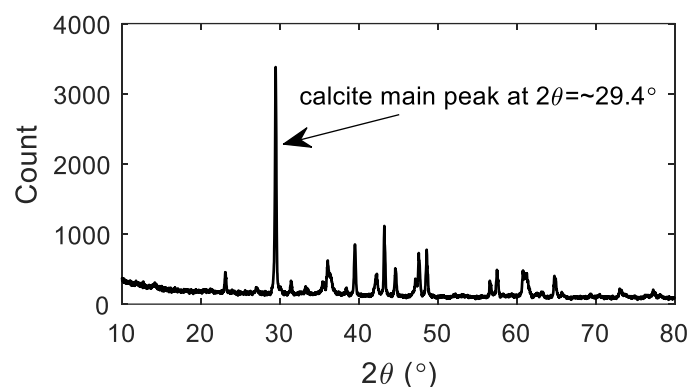

**Figure S2.** XRD pattern of precipitates sampled in column 2, cell 1. Note: the absence of contamination by slag dust in the XRD pattern was validated by producing a control XRD pattern composed of clean slag dust. The control XRD pattern did not show any peaks associated with calcite or hydroxyapatite (results not shown).

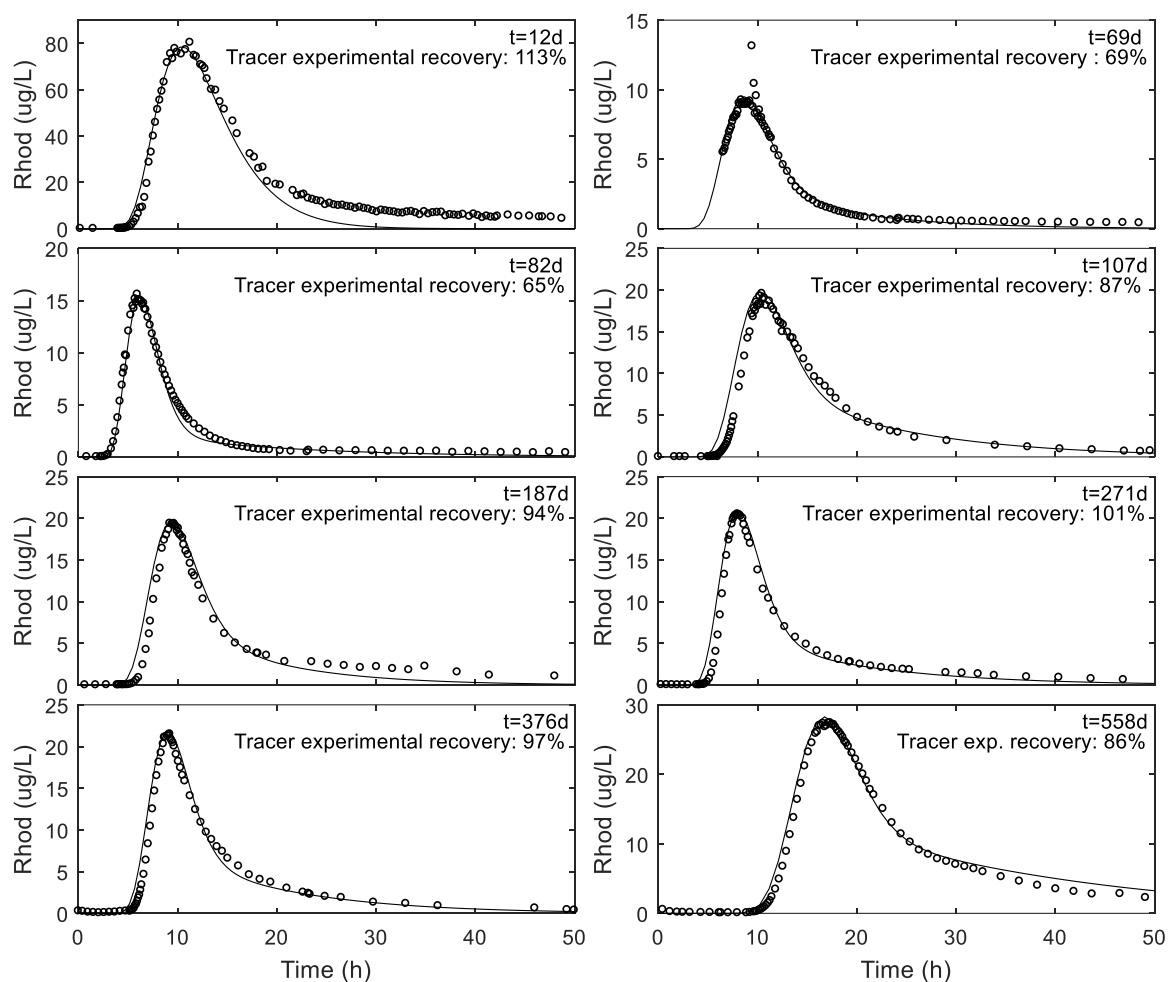

**Figure S3.** Tracer test calibration in column 1 at different times of operation (indicated at the top right corner). Tracer experimental recovery is indicated at the top right for each tracer test.

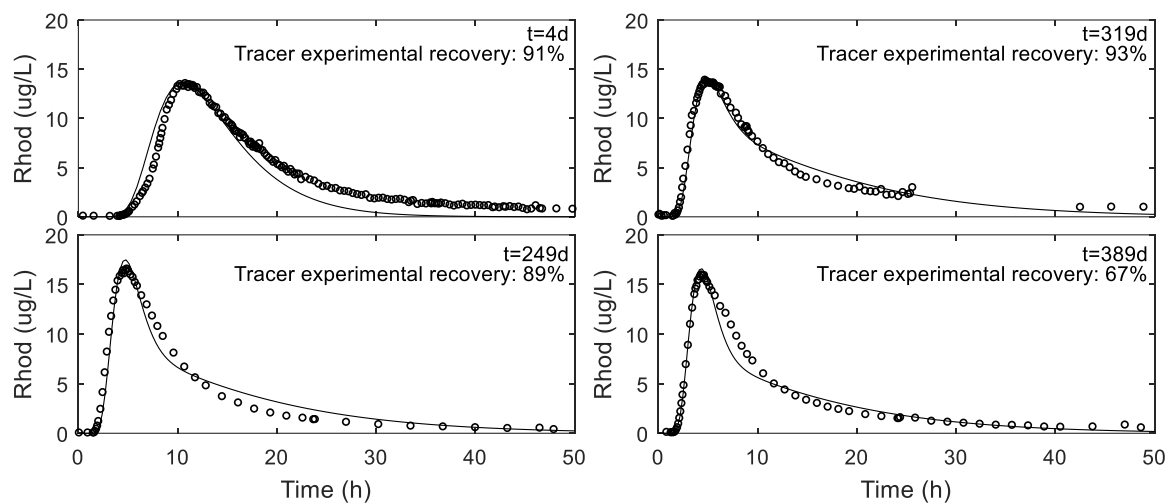

**Figure S4.** Tracer test calibration in column 2 at different times of operation (indicated at the top right corner). Tracer experimental recovery is indicated at the top right for each tracer test.

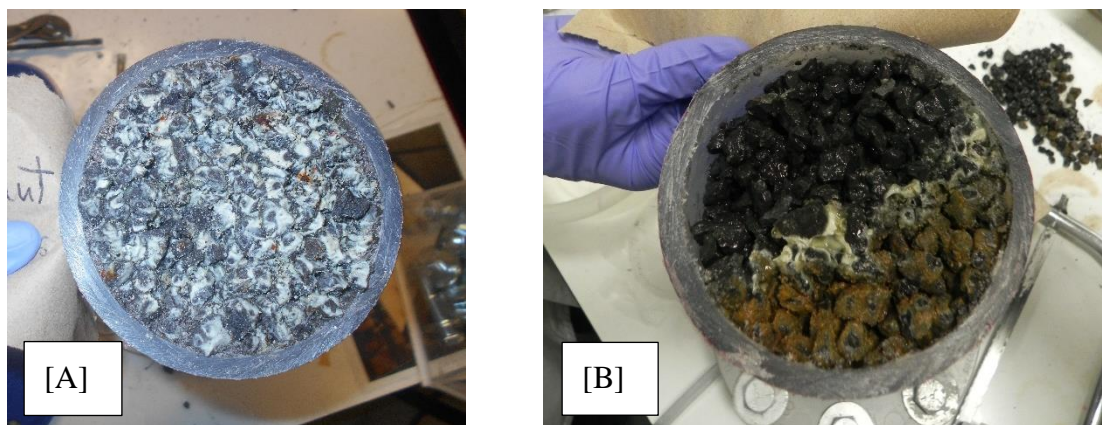

**Figure S5.** Pictures of column cross-sections at the interface between cells 2 and 3. **A:** column 1, showing black slag with a uniform distribution of white precipitates. **B:** column 2, showing irregular distribution of precipitation into zones of either black slag with few precipitates, or red slag with heavy cementation.

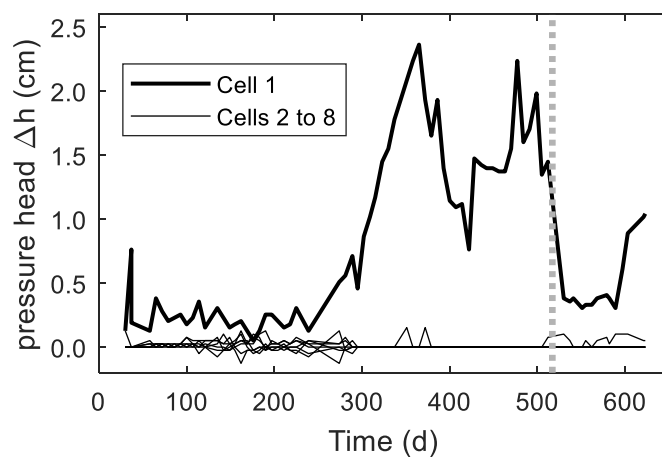

**Figure S6.** Pressure head buildup in column 1. The vertical dashed line indicates the reduction of influent flowrate from  $6.9 \pm 1.3$  mL/min to  $3.4 \pm 0.5$  mL/min.
